# Supplementary material
Source: PubMed Central journal article supplement (PMC6997734)
Supplement: AEM.02051-19-s0001.pdf [file AEM.02051-19-s0001.pdf]

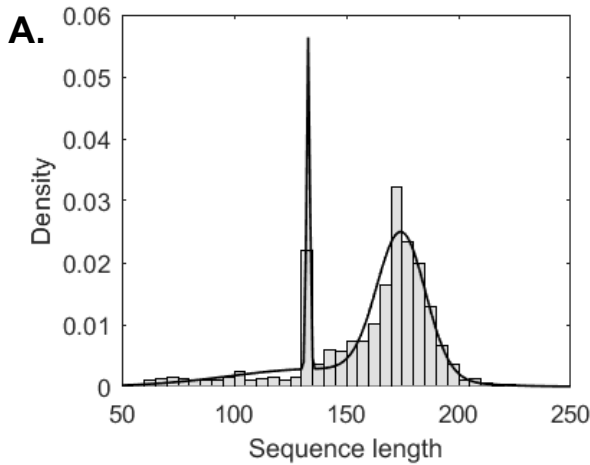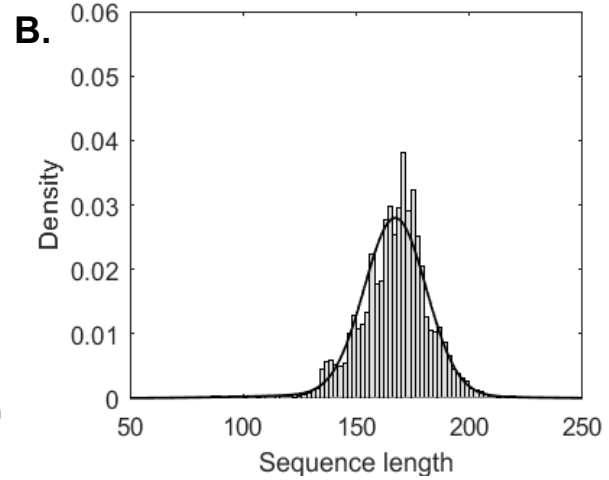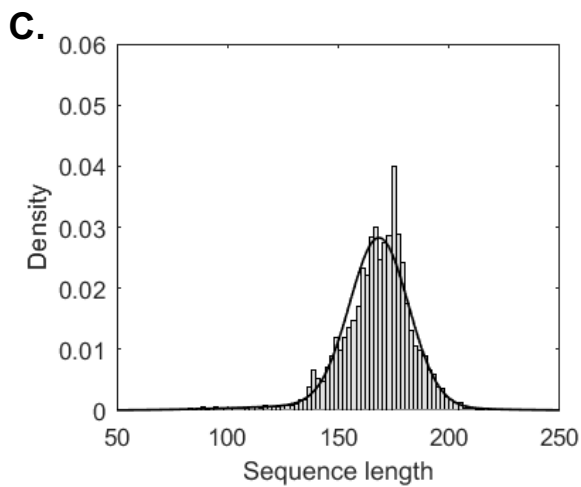

1

2

3 **FIG S1** Two- or three-component Gaussian mixture models (GMMs) fitted to the  
4 distribution of sequence lengths resulting from a jackhmmmer search of the UniProtKB  
5 database for homologs to the wild-type amidase domain of LysEFm5. (A) The taxonomy  
6 in the search was restricted to firmicutes only (three-component GMM). (B) The taxonomy  
7 in the search was restricted to bacteria only (two-component GMM). (C) The taxonomy in  
8 the search was not restricted (two-component GMM).

9

10

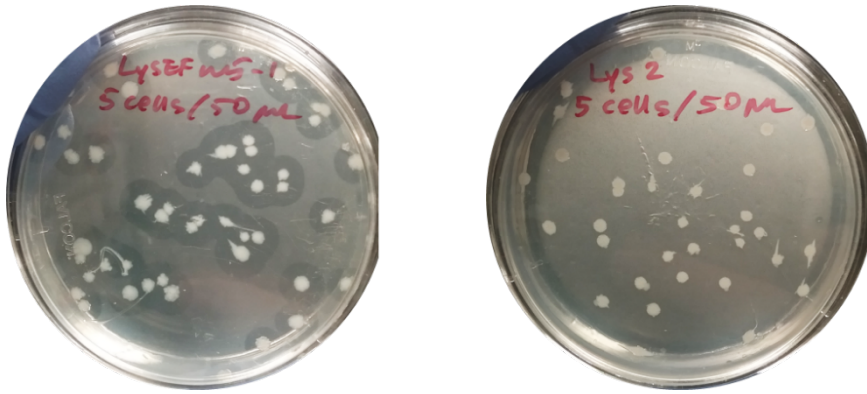

11

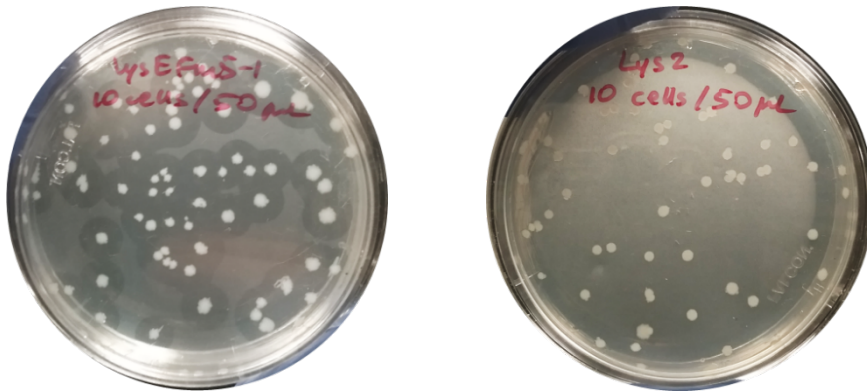

12 **FIG S2** *E. coli* expressing a lysin with alternative specificity do not form halos on  
13 LB+kan/VRE/IPTG plates. *E. coli* containing a plasmid encoding LysEFm5 (left) and Lys2,  
14 a *C. perfringens*-specific lysin (right) were plated in an identical manner on  
15 LB+kan/VRE/IPTG plates at two densities (top: 0.1 cells/ $\mu$ L; bottom: 0.2 cells/ $\mu$ L). After  
16 19 - 20 hr of incubation at 37°C, halos were observed on the LysEFm5 plates, but not on  
17 the Lys2 plates.

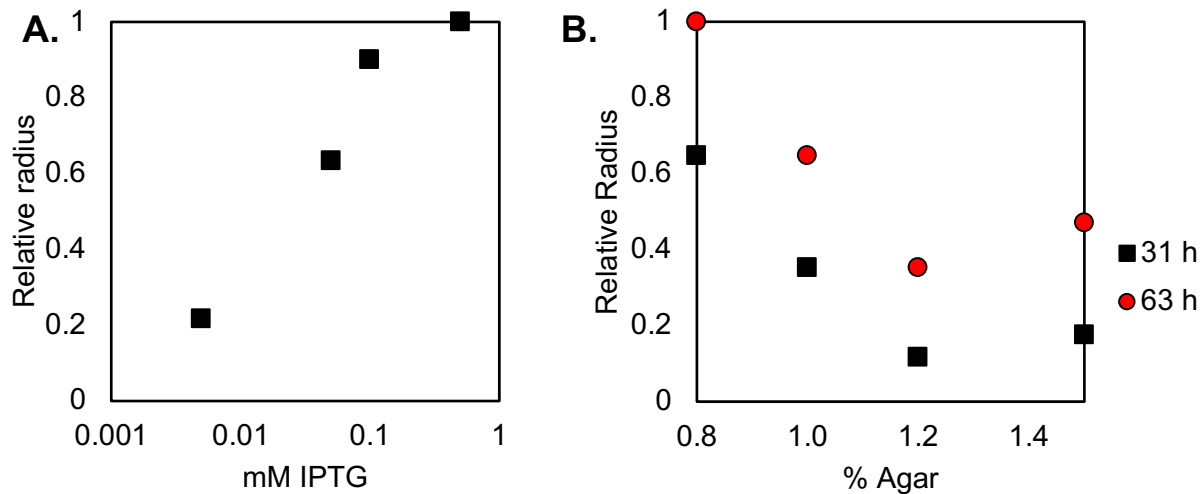

18

19 **FIG S3** Effect of IPTG, agar content, and time on halo radius. Expression-competent *E.*  
 20 *coli* containing pET:LysEFm5 were plated on LB + kan agar plates made with 2 w/v% LB,  
 21 50 µg/mL kan, 0.05 v/v% of stock autoclaved VRE (~0.3 g/mL cell material suspended in  
 22 PBS), deionized water, and (A) 0.005, 0.05, 0.1, and 0.5 mM IPTG (and 1.0 w/v% agar)  
 23 or (B) 0.8, 1.0, 1.2, and 1.5 w/v% agar (and 0.05 mM IPTG) in 15 mL of total volume.  
 24 Measurements were taken 19 hr after the start of incubation at 37°C for the IPTG-variable  
 25 plates, and 31 and 63 hr after the start of incubation at 37°C for the agar percentage-  
 26 variable plates. The radius of the halo around each colony was measured and  
 27 standardized according to the largest radius measured in that group. For both groups,  $n$   
 28 = 1, as this experiment was conducted only to determine an appropriate set of assay  
 29 conditions. A direct relationship between IPTG concentration/time and halo size, and an  
 30 inverse relationship between agar w/v% and halo size was observed. It was determined  
 31 that a final IPTG concentration of 0.05 mM, 1.0 w.v% agar, and an incubation time of 19  
 32 hr or greater was sufficient for the purposes of this assay.

33

34

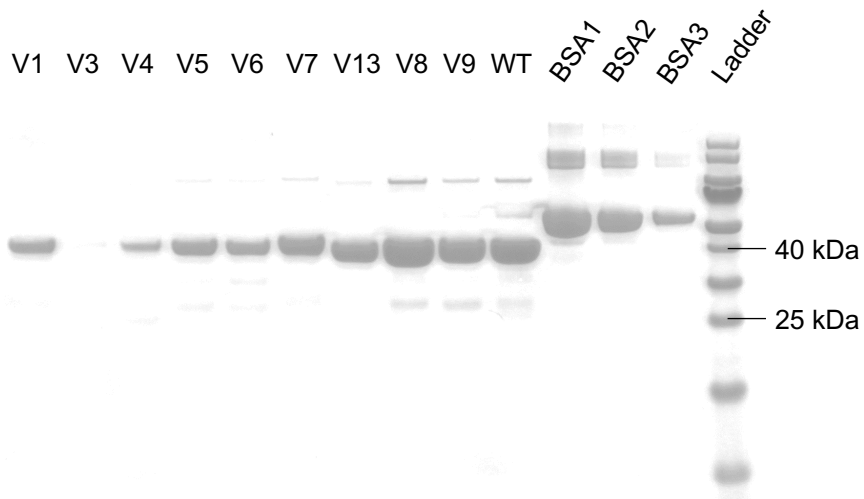

| Variant | Purity |
|---------|--------|
| 1       | 0.99   |
| 3       | N/A    |
| 4       | 0.97   |
| 5       | 0.97   |
| 6       | 0.96   |
| 7       | 0.98   |
| 8       | 0.90   |
| 9       | 0.93   |
| 13      | 0.99   |
| WT      | 0.91   |

35

36

37

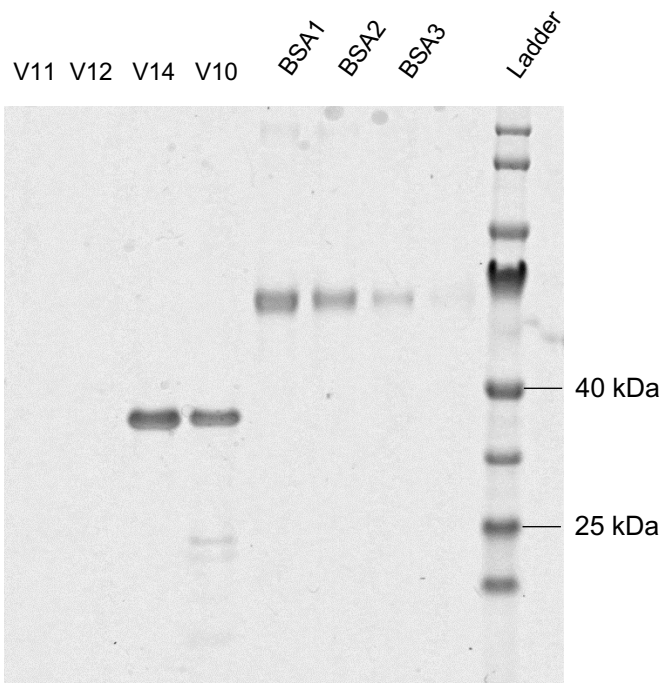

| Variant | Purity |
|---------|--------|
| 10      | 0.85   |
| 11      | N/A    |
| 12      | N/A    |
| 14      | 1.00   |

38

39 **FIG S4** SDS-PAGE used to determine variant concentrations. The bands of variants at

40 ~37 kDa correspond to the expected size of LysEFm5.

41

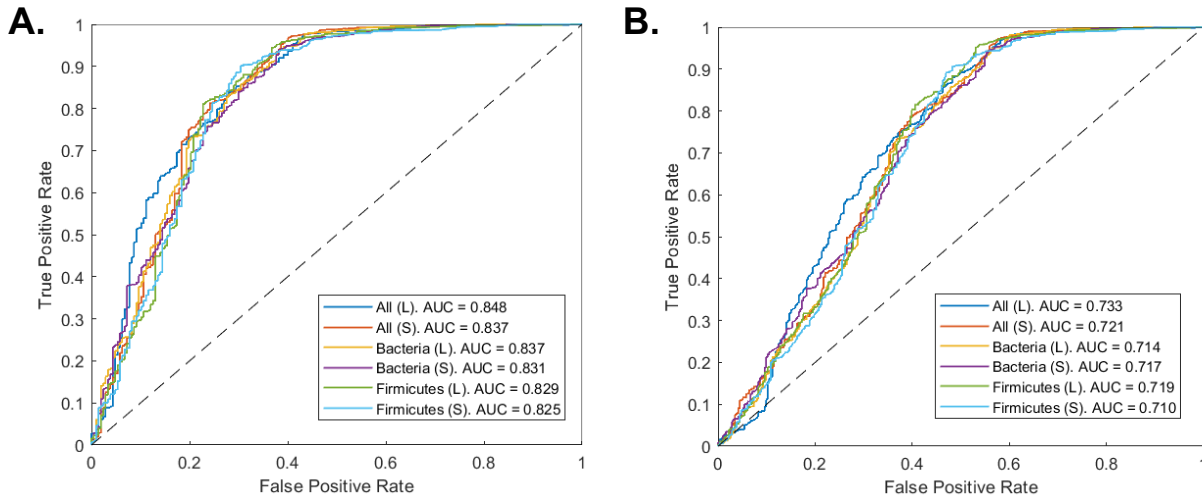

42

43 **FIG S5** Excluding sequences that lack a majority of inactive or active designations  
 44 improves the classification accuracy of the statistical fitness. ROC curves that quantify  
 45 the binary classification ability of the statistical fitness parameter are plotted for each  
 46 starting MSA (Table 1), provided that all 1731 sequences experimentally read at least  
 47 100 times are considered in the analysis (including those with the same number of active  
 48 and inactive observations). (A) Results when sequences with an active fraction of 0.5 are  
 49 considered active. The AUC ranges from 0.825 – 0.848, depending on the starting MSA.  
 50 (B) Results when sequences with an active fraction of 0.5 are considered inactive. The  
 51 AUC ranges from 0.710 – 0.733. Because on the order of hundreds, and up to a thousand,  
 52 individual colonies were plucked per library, it was expected that there would be  
 53 contamination from neighboring cell material some fraction of the time. Therefore,  
 54 observing the same number of active and inactive observations was ultimately attributed  
 55 to the contamination of one or more bins as a result of human error, leading to the  
 56 dismissal of these sequences from the analysis. When sequences with an active fraction  
 57 of 0.5 are excluded entirely, the AUC ranges from 0.840 – 0.894 (Fig. 8).

58 **TABLE S1** List of reactions and primers used to create NNK libraries 1-9

| Lib. | Rxn | Pos. 1 | Pos. 2 | Pos. 3 | Fragment size [bp] | Primer 1 | Primer 2 |
|------|-----|--------|--------|--------|--------------------|----------|----------|
| 1    | 1-1 | 33     | 40     |        | 132                | PRIM01   | PRIM03   |
|      | 1-2 |        |        |        | 936                | PRIM12   | PRIM02   |
| 2    | 2-1 | 40     | 47     |        | 153                | PRIM01   | PRIM04   |
|      | 2-2 |        |        |        | 915                | PRIM13   | PRIM02   |
| 3    | 3-1 | 45     | 87     |        | 147                | PRIM01   | PRIM05   |
|      | 3-2 |        |        |        | 150                | PRIM21   | PRIM24   |
|      | 3-3 |        |        |        | 774                | PRIM14   | PRIM02   |
| 4    | 4-1 | 32     | 38     |        | 126                | PRIM01   | PRIM06   |
|      | 4-2 |        |        |        | 939                | PRIM15   | PRIM02   |
| 5    | 5-1 | 33     | 45     |        | 147                | PRIM01   | PRIM07   |
|      | 5-2 |        |        |        | 936                | PRIM16   | PRIM02   |
| 6    | 6-1 | 47     | 91     |        | 153                | PRIM01   | PRIM08   |
|      | 6-2 |        |        |        | 156                | PRIM17   | PRIM22   |
|      | 6-3 |        |        |        | 762                | PRIM25   | PRIM02   |
| 7    | 7-1 | 34     | 35     |        | 117                | PRIM01   | PRIM09   |
|      | 7-2 |        |        |        | 933                | PRIM18   | PRIM02   |
| 8    | 8-1 | 74     | 83     |        | 261                | PRIM01   | PRIM10   |
|      | 8-2 |        |        |        | 813                | PRIM19   | PRIM02   |
| 9    | 9-1 | 33     | 40     | 87     | 132                | PRIM01   | PRIM11   |
|      | 9-2 |        |        |        | 186                | PRIM20   | PRIM23   |
|      | 9-3 |        |        |        | 774                | PRIM26   | PRIM02   |

59

60

61 **TABLE S2** NNK primer sequence identities

| Primer Name | Library | Sequence identity (5' → 3') <sup>a</sup>                        |
|-------------|---------|-----------------------------------------------------------------|
| PRIM01      | 1       | AAGAAGGAGATACATATGGTTGAG                                        |
| PRIM02      | 1       | CAGTGATGATGGTGGTGGCATCCNNNNNNNN<br>NNTTATTAATGGTGGTGGTGGTGGTGGT |
| PRIM03      | 1       | CGCCGCAAGGCGMNNTGCTTCTTGTGTTTGCAGTM<br>NNATTACCCCAAGT           |
| PRIM12      | 1       | ACTTGGGGTAATNNKACTGCAAACAAGAAGCAN<br>NKCGCCTTGCGGCG             |
| PRIM04      | 2       | GGCCAGCTGGTTMNNATTCATCGCCGCAAGGCG<br>MNNTGCTTCTTGTGTT           |
| PRIM13      | 2       | AAACAAGAAGCANNKCGCCTTGCGGCGATGAATN<br>NKAACCAGCTGGCC            |
| PRIM05      | 3       | GGTTATTATMNNCGCCGCAAGG                                          |
| PRIM14      | 3       | TGGTAATATGAACTATNNKGGATATGAAGTCTGTG                             |
| PRIM21      | 3       | CCTTGCGGCGNNKAATAATAACC                                         |
| PRIM24      | 3       | CACAGACTTCATATCCMNNATAGTTCATATTACCA                             |
| PRIM06      | 4       | AAGGCGAGTTGCMNNTTGTGTTTGCAGTTGAMNNA<br>CCCCAAGTATT              |
| PRIM15      | 4       | AATACTTGGGGTNNKTCAACTGCAAACAANNKGC<br>AACTCGCCTT                |
| PRIM07      | 5       | GGTTATTATMNNCGCCGCAAGGCGAGTTGCTTC<br>TTGTTTTGCAGTMNNATTACCCCAAG |
| PRIM16      | 5       | AATACTTGGGGTNNKTCAACTGCAAACAANNKGC<br>AACTCGCCTT                |
| PRIM08      | 6       | CAGCTGGTTMNNATTCATCGCC                                          |
| PRIM17      | 6       | GGCGATGAATNNKAACCAGCTG                                          |
| PRIM22      | 6       | CGTTGCCACAMNNTTCATATCCG                                         |
| PRIM25      | 6       | CGGATATGAANNKTGTGGCAACG                                         |

|        |   |                                                            |
|--------|---|------------------------------------------------------------|
| PRIM09 | 7 | TGCTTCTTGTTTMNMMNNTGAATTACCCCA                             |
| PRIM18 | 7 | TGGGGTAATTCANNKNNKAAACAAGAAGCA                             |
| PRIM10 | 8 | GATATAGTTCATMNNACCATCGCCATTGGCAGTGT<br>GCCAMNNACCATTGAACGT |
| PRIM19 | 8 | ACGTTCAATGGTNNKTGGCACACTGCCAATGGCG<br>ATGGTNNKATGAACTATATC |
| PRIM11 | 9 | CGCCGCAAGGCGSNNTGCTTCTTGTTTTGCAGTG<br>NBATTACCCCAAGT       |
| PRIM20 | 9 | ACTTGGGGTAATVNCAGTGCAAAACAAGAAGCAN<br>NSCGCCTTGCGGCG       |
| PRIM23 | 9 | GACTTCATATCCTAGATAGTTCATATT                                |
| PRIM26 | 9 | AATATGAACTATCTAGGATATGAAGTC                                |

---

62 <sup>a</sup>N = G, T, A, or C; V = G, T, or A; B = G, T, or C; M = A or C; R = A or G; W = A or T; S  
63 = G or C; K = G or T.

64

65



66 **TABLE S3** High-throughput sequencing primer identities.

| Primer Name | Sequence identity (5' → 3') <sup>a</sup>                               |
|-------------|------------------------------------------------------------------------|
| FA1         | TTTCCCTACACGACGCTCTTCCGATCTNNNNNGTCGTTTTTCATAA<br>TACTTGGGGT           |
| FA2         | TTTCCCTACACGACGCTCTTCCGATCTNNNNNGTCGTTTTTCATA<br>ATACTTGGGGT           |
| FA3         | TTTCCCTACACGACGCTCTTCCGATCTNNNNNGTCGTTTTTCAT<br>AATACTTGGGGT           |
| FA4         | TTTCCCTACACGACGCTCTTCCGATCTNNNNNNNGTCGTTTTTCA<br>TAATACTTGGGGT         |
| FA5         | TTTCCCTACACGACGCTCTTCCGATCTNNNNNNNGTCGTTTTT<br>CATAATACTTGGGGT         |
| RA1         | G TTCAGACGTGTGCTCTTCCGATCTNNNNAGTCTGATCGTTGCC<br>ACA                   |
| RA2         | G TTCAGACGTGTGCTCTTCCGATCTNNNNNAGTCTGATCGTTGC<br>CACA                  |
| RA3         | G TTCAGACGTGTGCTCTTCCGATCTNNNNNNAGTCTGATCGTTG<br>CCACA                 |
| RA4         | G TTCAGACGTGTGCTCTTCCGATCTNNNNNNNAGTCTGATCGTT<br>GCCACA                |
| RA5         | G TTCAGACGTGTGCTCTTCCGATCTNNNNNNNNAGTCTGATCGT<br>TGCCACA               |
| FB          | AATGATACGGCGACCACCGAGATCTACACTCTTTCCCTACACGA<br>CGCTCTTCCGATCT         |
| RB1         | CAAGCAGAAGACGGCATAACGAGATAAGCTAGTGACTGGAGTTCA<br>GACGTGTGCTCTTCCGATCT  |
| RB2         | CAAGCAGAAGACGGCATAACGAGATGTAGCCGTGACTGGAGTTCC<br>AGACGTGTGCTCTTCCGATCT |
| RB3         | CAAGCAGAAGACGGCATAACGAGATTACAAGGTGACTGGAGTTCA<br>GACGTGTGCTCTTCCGATCT  |
| RB4         | CAAGCAGAAGACGGCATAACGAGATTTGACTGTGACTGGAGTTCA<br>GACGTGTGCTCTTCCGATCT  |
| RB5         | CAAGCAGAAGACGGCATAACGAGATTGACATGTGACTGGAGTTCA<br>GACGTGTGCTCTTCCGATCT  |
| RB6         | CAAGCAGAAGACGGCATAACGAGATGGACGGGTGACTGGAGTTCC<br>AGACGTGTGCTCTTCCGATCT |

67 <sup>a</sup>N = G, T, A, or C.
